# Supplementary material for: Efficacy and safety of a digital check-in and triage kiosk in emergency departments: a systematic review protocol
Source: PubMed Central journal article supplement — BMJ Open. 2024 Jul 24;14(7):e084506. doi: 10.1136/bmjopen-2024-084506 (PMC11284892; doi:10.1136/bmjopen-2024-084506), 2024-07-24
Supplement: bmjopen-14-7-s001.pdf [file bmjopen-14-7-s001.pdf]

## Appendices

### Appendix 1. Search Strategy

| <i>Search items</i> |                                                                                                                                                                   | <i>Concepts</i>      |
|---------------------|-------------------------------------------------------------------------------------------------------------------------------------------------------------------|----------------------|
| 1                   | Accident and emergency* or emergency care or urgent care*                                                                                                         | Emergency department |
| 2                   | Emergency medical services/ or emergency service, hospital/                                                                                                       |                      |
| 3                   | <b>1 or 2</b>                                                                                                                                                     |                      |
| 4                   | Self-service check-in or (electronic triage or digital triage or etriage or e-triage) or (electronic adj2 check-in) or self-triage or self-assess* or tele-triage | Kiosks               |
| 5                   | Triage/ or diagnostic self-evaluation/ or self-assessment/                                                                                                        |                      |
| 6                   | <b>4 or 5</b>                                                                                                                                                     | Safety               |
| 7                   | Clinical outcomes or clinical safety or misdiagnos* or error* or near miss*                                                                                       |                      |
| 8                   | Patient safety/ or patient harm/ or medical errors/ or treatment outcome/                                                                                         |                      |
| 9                   | Safety management/ or risk management/                                                                                                                            |                      |
| 10                  | <b>7 or 8 or 9</b>                                                                                                                                                | Efficacy             |
| 11                  | Patient flow or (wait* list* or wait* time*) or triage time or (efficiency or triage efficiency)                                                                  |                      |
| 12                  | Efficacy, efficiency, organisational/ or efficiency/ or workflow/ or workload/                                                                                    |                      |
| 13                  | Waiting lists/ or time-to-treatment/                                                                                                                              |                      |
| 14                  | <b>11 or 12 or 13</b>                                                                                                                                             |                      |
| 15                  | <b>3 and 6 and 10 and 14</b>                                                                                                                                      |                      |
